# Supplementary material
Source: publisher site journal article supplement (https://www.dovepress.com/article/119995)
Supplement: Supplementary file 1 [file get_supplementary_file.php]

## Supporting information

### Novel 5-Oxo-hexahydroquinoline Derivatives: Design, Synthesis, *In vitro* P-glycoprotein Mediated Multidrug Resistance (MDR) Reversal Profile and Molecular Dynamics Simulation Study

Omolbanin Shahraki<sup>1,2</sup>, Najmeh Edraki<sup>1</sup>, Mehdi Khoshneviszadeh<sup>1,2</sup>, Farshid Zargari<sup>1</sup>, Sara Ranjbar<sup>1,2</sup>, Luciano Saso<sup>3</sup>, Omidreza Firuzi<sup>1\*</sup>, Ramin Miri<sup>1\*</sup>

#### Synthesis:

##### 3.1.1.1. 3-oxo-N-phenylbutanamide (**1a**).

Yield 82%; white powder; <sup>1</sup>H NMR (300MHz, DMSO-d<sub>6</sub>) δ (ppm): 8.50 (s, 1H, amide N-H), 7.39 (d, 2H, *J* = 7.8 Hz, C<sub>2</sub>, C<sub>6</sub> phenyl-H), 7.21 (t, 2H, *J* = 8.1 Hz, C<sub>3</sub>, C<sub>5</sub> phenyl-H), 6.89 (t, 1H, *J* = 7.5 Hz, C<sub>4</sub> phenyl-H), 5.83 (s, 2H, CH<sub>2</sub>), 2.51 (s, 3, CH<sub>3</sub>). MS m/z (%):177 (43) [M<sup>+</sup>], 160 (70), 93 (100), 85 (5), 77 (27).

##### 3.1.1.1. N-(4-nitrophenyl)-3-oxobutanamide (**2a**)

Yield 55%; white powder; <sup>1</sup>H NMR (300MHz, DMSO-d<sub>6</sub>) δ (ppm): IR (KBr) ν (cm<sup>-1</sup>): 3289.2 (N-H, amide), 3069.3 (C-H, aromatic), 2957.7, 2894.6 (C-H, aliphatic), 1712.1 (C=O, ketone), 1662.5 (C=O, amide); MS m/z (%):211.10 (23) [M+1], 155.10 (12), 128.00 (100), 101.00 (21), 43.00 (18).

##### 3.1.1.2. 4-(3-oxobutanamido) benzoic acid (**4a**).

Yield 56%; white powder; <sup>1</sup>H NMR (300MHz, DMSO-d<sub>6</sub>) δ (ppm): 12.71 (s, 1H, O-H), 10.38 (s, 1H, amide N-H), 7.89 (d, 2H, *J* = 8.7 Hz, C<sub>2</sub>, C<sub>6</sub> phenyl-H), 7.21 (t, 2H, *J* = 8.7 Hz C<sub>3</sub>, C<sub>5</sub> phenyl-H), 3.60 (s, 2H, CH<sub>2</sub>), 2.22 (s, 3H, CH<sub>3</sub>). MS m/z (%): 222.20 (87) [M], 206.20 (1), 138.10 (100), 108.00 (49).

### 3.1.1.3. N-(4-cyanophenyl)-3-oxobutanamide (**5a**)

Yield 78%; white powder;  $^1\text{H NMR}$  (300MHz, DMSO- $d_6$ )  $\delta$  (ppm): 10.51 (s, 1H, amide N-H), 7.80-7.73 (m, 4H, phenyl-H), 3.62 (s, 2H, CH<sub>2</sub>), 2.21 (s, 3H, CH<sub>3</sub>). MS m/z (%): 183.10 (1), 149.10 (14), 85.00 (26), 43.00 (100).

### 3.1.2. General procedure for the synthesis of different 5-oxo-1,4,5,6,7,8-hexahydroquinoline-3-carboxamide derivatives

For the synthesis of each final compound, corresponding intermediate obtained from the previous step, different aldehydes and 1,3-cyclohexadione were dissolved in equimolar amounts, the mixture in the presence of excess amount of ammonium acetate (3 mmol) was refluxed overnight. The solvent was removed under vacuum. The deposit was washed using petroleum ether. Further purification was carried out by different chromatographic methods using chloroform/ethanol (95:5) as the eluent. The pure product was obtained by recrystallization from ethyl acetate (table 2).

#### 3.1.2.1. 2-methyl-4-(3-nitrophenyl)-5-oxo-N-phenyl-1,4,5,6,7,8-hexahydroquinoline-3-carboxamide (**1d**)

Yield 46%; yellow powder; mp. 167°C;  $\delta$  (ppm):  $\delta$   $^1\text{H NMR}$  (300MHz, DMSO- $d_6$ )  $\delta$ : 9.66 (s, 1H, NH-amide), 8.98 (s, 1H, DHP-NH), 8.00-7.95 (m, 2H, C<sub>2'</sub>, C<sub>4'</sub> nitrophenyl-H), 7.63 (d, 1H,  $J = 7.8$  Hz, C<sub>6'</sub> nitrophenyl-H), 7.54-7.50 (m, 3H, C<sub>5'</sub> nitrophenyl-H, C<sub>2'</sub>, C<sub>6'</sub> phenyl-H), 7.24 (t, 2H,  $J = 7.5$  Hz, C<sub>3'</sub>, C<sub>5'</sub> phenyl-H), 7.00 (t, 1H,  $J = 7.5$  Hz, C<sub>4'</sub> phenyl-H), 5.12 (s, 1H, DHP C<sub>4</sub>-H), 2.23-2.19 (m, 2H, cyclohexanone C<sub>8</sub>-H), 2.08 (s, 3H, DHP CH<sub>3</sub>-H), 1.92-1.9 (2m, 2H, cyclohexanone C<sub>7</sub>-H).  $^{13}\text{C NMR}$  (75 MHz, DMSO)  $\delta$ : 194.66, 167.43, 153.41, 149.62, 148.11, 139.56, 135.97, 134.74, 129.94, 128.94, 123.62, 122.34, 121.36, 120.23, 110.33, 108.73, 38.56, 37.15, 26.78, 21.34, 17.49. IR (KBr)  $\nu$  (cm<sup>-1</sup>): 3264 (DHP N-H), 3068 (C-H, aromatic), 2948 (C-H, aliphatic), 1597 (C=O, amide, ketone), 1526, 1348 (C-NO<sub>2</sub>

aromatic); MS m/z (%): 403.10 (16) [M], 386.20 (100), 356.10 (7), 311.10 (76), 281.10 (77), 188.00 (17), 162.10 (15), 93.00 (32). Anal. Calcd. C, 68.47; H, 5.25; N, 10.42; Found: C, 68.32; H, 5.14; N, 10.30 (%).

### 3.1.2.2. 2-methyl-4-(4-nitrophenyl)-5-oxo-N-phenyl-1,4,5,6,7,8-hexahydroquinoline-3-carboxamide (**1e**)

Yield 65%; orange powder; mp. 254 °C;  $\delta$  (ppm):  $\delta$  <sup>1</sup>H NMR (300MHz, DMSO-d<sub>6</sub>)  $\delta$ : 8.09 (d, 2H, *J* = 8.7 Hz, C<sub>3''</sub>, C<sub>5''</sub> nitrophenyl-H), 7.54 (d, 2H, *J* = 7.8 Hz, C<sub>2'</sub>, C<sub>6'</sub> phenyl-H), 7.45 (d, 2H, *J* = 8.7 Hz, C<sub>2''</sub>, C<sub>6''</sub> nitrophenyl-H), 7.24 (t, 2H, *J* = 7.8 Hz, C<sub>3'</sub>, C<sub>5'</sub> phenyl-H), 7.00 (t, 1H, *J* = 7.5 Hz, C<sub>4'</sub> phenyl-H), 5.10 (s, 1H, DHP C<sub>4</sub>-H), 2.23-2.22 (m, 2H, cyclohexanone C<sub>8</sub>-H), 2.06 (s, 3H, DHP-CH<sub>3</sub>), 1.90-1.80 (2×m, 2H, cyclohexanone C<sub>7</sub>-H). IR (KBr)  $\nu$  (cm<sup>-1</sup>): 3322 (DHP N-H), 3078 (C-H, aromatic), 2943 (C-H, aliphatic), 1671 (C=O, ketone), 1617 (C=O, amide), 1601 (C=C, aromatic) 1507, 1386 (C-NO<sub>2</sub> aromatic); MS m/z (%): 404.10 (25) [M+2]<sup>+</sup>, 403.10 (98) [M], 311.10 (100), 281.10 (91), 265.00 (18), 188.00 (25), 93.00 (48). Anal. Calcd. C, 68.47; H, 5.25; N, 10.42; Found: C, 68.32; H, 5.16; N, 10.31 (%).

### 3.1.2.3. 2-methyl-4-(2-nitrophenyl)-5-oxo-N-phenyl-1,4,5,6,7,8-hexahydroquinoline-3-carboxamide (**1c**)

Yield 42%; white powder; mp. 242 °C;  $\delta$  (ppm):  $\delta$  <sup>1</sup>H NMR (300MHz, DMSO-d<sub>6</sub>)  $\delta$ : 9.65 (s, 1H, amide-NH), 8.93 (s, 1H, DHP-NH), 7.64 (d, 1H, *J* = 7.8 Hz, C<sub>3''</sub> nitrophenyl-H), 7.60 (d, 1H, *J* = 7.8 Hz, C<sub>6''</sub> nitrophenyl-H), 7.55-7.49 (m, 3H, C<sub>5''</sub> nitrophenyl-H, C<sub>2'</sub>, C<sub>6'</sub> phenyl-H), 7.33-7.28 (m, 1H, C<sub>4''</sub> nitrophenyl-H), 7.23 (t, 2H, *J* = 7.8 Hz, C<sub>3'</sub>, C<sub>5'</sub> phenyl-H), 6.98 (t, 1H, *J* = 7.5 Hz, C<sub>4'</sub> phenyl-H), 5.56 (s, 1H, DHP-C<sub>4</sub>-H), 2.47-2.43 (m, 2H, cyclohexanone C<sub>6</sub>-H), 2.14- 2.08 (m, 5H, cyclohexanone C<sub>8</sub>-H, DHP-CH<sub>3</sub>), 1.87-1.70 (2×m, 2H, cyclohexanone C<sub>7</sub>-H). IR (KBr)  $\nu$  (cm<sup>-1</sup>): 3269 (DHP N-H), 3066 (C-H, aromatic), 2951 (C-H, aliphatic), 1736 (C=O, ketone), 1669 (C=O, amide), 1602 (C=C, aromatic) 1520, 1354 (C-NO<sub>2</sub> aromatic); MS m/z (%): 403.10 (5) [M], 386.10 (100), 355.10 (25), 328.10 (24), 281.10 (30), 250.10 (72), 188.00 (17). Anal. Calcd. C, 68.47; H, 5.25; N, 10.42; Found: C, 68.36; H, 5.17; N, 10.29 (%).

### 3.1.2.4. 2-methyl-5-oxo-N,4-diphenyl-1,4,5,6,7,8-hexahydroquinoline-3-carboxamide (**1f**)

Yield 74%; white powder; mp. 276 °C; <sup>1</sup>H NMR (300MHz, DMSO-d<sub>6</sub>) δ (ppm): δ 7.55 (d, 2H, *J* = 7.5 Hz, C<sub>2'</sub>, C<sub>6'</sub> phenyl-H), 7.24 (t, 2H, *J* = 7.8 Hz, C<sub>3'</sub>, C<sub>5'</sub> phenyl-H), 7.18- 7.17 (m, 4H, C<sub>2''</sub>, C<sub>3''</sub>, C<sub>5''</sub>, C<sub>6''</sub> phenyl-H), 7.09-7.05 (m, <sup>1</sup>H, C<sub>4'</sub> phenyl-H), 6.98 (t, 1H, *J* = 7.5 Hz, C<sub>4''</sub> phenyl-H), 4.99 (s, 1H, DHP C<sub>4</sub>-H), 2.21-2.17 (m, 2H, cyclohexanone C<sub>8</sub>-H), 2.04 (s, 3H, DHP-CH<sub>3</sub>), 1.91- 1.78 (2×m, 2H, cyclohexanone C<sub>7</sub>-H). IR (KBr) ν (cm<sup>-1</sup>): 3227 (DHP N-H), 3071 (C-H, aromatic), 2954 (C-H, aliphatic), 1666 (C=O, ketone), 1629 (C=O, amide), 1607 (C=C, aromatic); MS m/z (%): 360.20 (3) [M+2]<sup>+</sup>, 359.20 (23) [M+1]<sup>+</sup>, 358.20 (87) [M], 281.20 (100), 266.10 (98), 238.10 (12), 188.00 (17). Anal. Calcd. C, 77.07; H, 6.19; N, 7.82; Found: C, 76.87; H, 6.02; N, 7.68 (%).

### 3.1.2.5. N-(4-chlorophenyl)-2-methyl-4-(3-nitrophenyl)-5-oxo-1,4,5,6,7,8-hexahydroquinoline-3-carboxamide (**2d**)

Yield 51%; yellow powder; mp. 209 °C; <sup>1</sup>H NMR (300MHz, DMSO-d<sub>6</sub>) δ (ppm): δ 9.80 (s, 1H amide-NH), 9.01 (s, 1H, DHP-NH), 7.99-7.95 (m, 2H, *J* = 8.1 Hz, *J* = 1.8 Hz, C<sub>2''</sub>, C<sub>4''</sub> nitrophenyl-H), 7.63-7.48 (m, 4H, C<sub>6''</sub>, C<sub>5''</sub> nitrophenyl-H, C<sub>2'</sub>, C<sub>6'</sub> chlorophenyl-H), 7.29 (d, 2H, C<sub>3'</sub>, C<sub>5'</sub> chlorophenyl-H), 5.12 (s, 1H, DHP C<sub>4</sub>-H), 2.25-2.21 (m, 2H, cyclohexanone C<sub>8</sub>-H), 2.08 (s, 3H, DHP-CH<sub>3</sub>), 1.92-1.79 (2×m, 2H, cyclohexanone C<sub>7</sub>-H). IR (KBr) ν (cm<sup>-1</sup>): 3291 (DHP N-H), 3073 (C-H, aromatic), 2947 (C-H, aliphatic), 1731 (C=O, ketone), 1681 (C=O, amide), 1588 (C=C, aromatic), 1523, 1351 (C-NO<sub>2</sub> aromatic), 814.1 (C-Cl); MS m/z (%): 439.10 (3) [M+2]<sup>+</sup>, 437.10 (14) [M], 422.10 (12), 315.10 (28), 311.10 (100), 309.10 (70), 235.10 (31), 188.00 (8), 162.10(63). Anal. Calcd. C, 63.09; H, 4.60; N, 9.60; Found: C, 62.83; H, 4.43; N, 9.43 (%).

### 3.1.2.6. N-(4-chlorophenyl)-2-methyl-4-(4-nitrophenyl)-5-oxo-1,4,5,6,7,8-hexahydroquinoline-3-carboxamide (**2e**)

Yield 39%; pale yellow powder; mp. 242 °C; <sup>1</sup>H NMR (300MHz, DMSO-d<sub>6</sub>) δ (ppm): δ 9.80 (s, 1H, amide-NH), 8.99 (s, 1H, DHP-NH), 8.08 (d, 2H, *J* = 8.7 Hz, C<sub>3''</sub>, C<sub>5''</sub> nitrophenyl-H), 7.58 (d, 2H, *J* = 9.0

Hz, C<sub>2'</sub>, C<sub>6'</sub> chlorophenyl-H), 7.42 (d, 2H, *J* = 9.0 Hz, C<sub>3'</sub>, C<sub>5'</sub> chlorophenyl-H), 7.30 (d, 2H, *J* = 8.7 Hz, C<sub>2''</sub>, C<sub>6''</sub> nitrophenyl-H), 5.11 (s, <sup>1</sup>H, DHP C<sub>4</sub>-H), 2.22-2.18 (m, 2H, cyclohexanone C<sub>8</sub>-H), 2.06 (s, 3H, DHP-CH<sub>3</sub>), 1.91-1.80 (2×m, 2H, cyclohexanone C<sub>7</sub>-H). IR (KBr)  $\nu$  (cm<sup>-1</sup>): 3291 (DHP N-H), 3074 (C-H, aromatic), 2942 (C-H, aliphatic), 1682 (C=O, ketone), 1655 (C=O, amide), 1580 (C=C, aromatic), 1517, 1343 (C-NO<sub>2</sub> aromatic), 814 (C-Cl); MS *m/z* (%): 439.10 (12) [M+2]<sup>+</sup>, 437.10 (42) [M], 422.10 (2), 315.10 (27), 311.10 (79), 309.10 (100), 235.00 (31), 188.00 (19), 162.10 (27). Anal. Calcd. C, 63.09; H, 8.10; N, 9.60; Found: C, 62.79; H, 8.01; N, 9.46 (%).

**3.1.2.7.** N-(4-chlorophenyl)-2-methyl-4-(2-nitrophenyl)-5-oxo-1,4,5,6,7,8-hexahydroquinoline-3-carboxamide (**2c**)

Yield 56%; yellow powder; mp. 269 °C; <sup>1</sup>H NMR (300 MHz, DMSO-d<sub>6</sub>)  $\delta$  (ppm):  $\delta$  9.82 (s, 1H, amide-NH), 7.64-7.56 (m, 4H, C<sub>3''</sub>, C<sub>5''</sub> nitrophenyl-H, C<sub>6'</sub>, C<sub>2'</sub> chlorophenyl-H), 7.50 (d, 1H, *J* = 7.8 Hz, C<sub>6''</sub> nitrophenyl-H), 7.33-7.25 (m, 3H, C<sub>4''</sub> nitrophenyl-H, C<sub>3'</sub>, C<sub>5'</sub> chlorophenyl-H), 5.53 (s, 1H, DHP C<sub>4</sub>-H), 2.46-2.43 (m, 2H, cyclohexanone C<sub>6</sub>-H), 2.10-2.06 (m, 5H, cyclohexanone C<sub>8</sub>-H, DHP-CH<sub>3</sub>), 1.85-1.71 (2m, 2H, cyclohexanone C<sub>7</sub>-H). <sup>13</sup>C NMR (75 MHz, DMSO)  $\delta$ : 194.29, 166.90, 152.74, 148.35, 141.62, 138.65, 136.42, 133.57, 131.77, 129.28, 128.83, 127.46, 126.96, 123.50, 121.33, 109.92, 36.83, 33.88, 26.68, 21.29, 17.33. IR (KBr)  $\nu$  (cm<sup>-1</sup>): 3264 (DHP N-H), 3075 (C-H, aromatic), 2950 (C-H, aliphatic), 1678 (C=O, ketone), 1641 (C=O, amide), 1601 (C=C, aromatic), 1528, 1385 (C-NO<sub>2</sub> aromatic), 837 (C-Cl); MS *m/z* (%): 439.10 (2) [M+2]<sup>+</sup>, 437.10 (6) [M], 422.10 (24), 420.10 (70), 315.10 (16), 261.10 (100), 235.00 (43), 188.00 (18), 160.00 (11). Anal. Calcd. C, 63.09; H, 4.60; N, 9.60; Found: C, 62.75; H, 4.47; N, 9.48; (%).

**3.1.2.8.** N-(4-chlorophenyl)-2-methyl-5-oxo-4-phenyl-1,4,5,6,7,8-hexahydroquinoline-3-carboxamide (**2f**)

Yield 72%; white powder; mp. 154 °C; <sup>1</sup>H NMR (300 MHz, DMSO-d<sub>6</sub>)  $\delta$  (ppm):  $\delta$  9.70 (s, 1H, amide-NH), 8.81 (s, 1H, DHP-NH), 7.60 (dd, 2H, *J* = 9.0 Hz, *J* = 1.7 Hz, C<sub>2'</sub>, C<sub>6'</sub> chlorophenyl-H), 7.31-7.28 (m,

2H, C<sub>3'</sub>, C<sub>5'</sub> chlorophenyl-H), 7.21-7.13 (m, 4H, C<sub>2''</sub>, C<sub>3''</sub>, C<sub>5''</sub>, C<sub>6''</sub> phenyl-H), 7.09-7.06 (m, 1H, C<sub>4''</sub> phenyl-H), 4.99 (s, 1H, DHP C<sub>4</sub>-H), 2.21-2.18 (m, 2H, cyclohexanone C<sub>8</sub>-H), 2.04 (s, 3H, DHP-CH<sub>3</sub>), 1.91-1.80 (2m, 2H, cyclohexanone C<sub>7</sub>-H). IR (KBr)  $\nu$  (cm<sup>-1</sup>): 3176 (DHP N-H), 3054 (C-H, aromatic), 2952 (C-H, aliphatic), 1662 (C=O, ketone), 1605 (C=O, amide), 821 (C-Cl); MS m/z (%): 394.20 (13) [M+2]<sup>+</sup>, 392.20 (36) [M], 377.20 (3), 315.10 (50), 266.10 (100), 238.10 (9), 188.10 (13), 160.10(10). Anal. Calcd. C, 70.31; H, 5.39; N, 7.13; Found: C, 70.13; H, 5.26; N, 7.01 (%).

**3.1.2.9.** 2-methyl-4-(3-nitrophenyl)-N-(4-nitrophenyl)-5-oxo-1,4,5,6,7,8-hexahydroquinoline-3-carboxamide (**3d**)

Yield 37%; yellow powder; mp. 242 °C; <sup>1</sup>H NMR (300MHz, DMSO-d<sub>6</sub>)  $\delta$  (ppm):  $\delta$  8.16 (d, 2H, *J* = 9.3 Hz, C<sub>3'</sub>, C<sub>5'</sub> nitrophenyl-H), 7.99-7.96 (m, 2H, C<sub>2''</sub>, C<sub>4''</sub> nitrophenyl-H), 7.80 (d, 2H, *J* = 9.3 Hz C<sub>2'</sub>, C<sub>6'</sub> nitrophenyl-H), 7.62 (d, 1H, *J* = 7.8 Hz, C<sub>6''</sub> nitrophenyl-H), 7.52 (t, 1H, *J* = 7.8 Hz, C<sub>5''</sub> nitrophenyl-H), 5.16 (s, 1H, DHP C<sub>4</sub>-H), 2.25-2.21 (m, 2H, cyclohexanone C<sub>8</sub>-H), 2.11 (s, 3H, DHP-CH<sub>3</sub>), 1.99-1.80 (2×m, 2H, cyclohexanone C<sub>7</sub>-H). IR (KBr)  $\nu$  (cm<sup>-1</sup>): 3272 (DHP N-H), 3069 (C-H, aromatic), 2948 (C-H, aliphatic), 1681 (C=O, ketone), 1655 (C=O, amide), 1609 (C=C, aromatic), 1533, 1335 (C-NO<sub>2</sub> aromatic); MS m/z (%): 449.10 (3) [M+1]<sup>+</sup>, 448.10 (13) [M], 432 .10(16), 431.10 (59), 326 .10(100), 311.10 (68), 267 .10(12), 188.00 (14), 162.00 (34). Anal. Calcd. C, 61.60; H, 4.50; N, 12.49; Found: C, 61.38; H, 4.26; N, 12.32 (%).

**3.1.2.10.** 2-methyl-N,4-bis(4-nitrophenyl)-5-oxo-1,4,5,6,7,8-hexahydroquinoline-3-carboxamide (**3e**)

Yield 46%; pale yellow powder; mp. 268 °C; <sup>1</sup>H NMR (300MHz, DMSO-d<sub>6</sub>)  $\delta$  (ppm):  $\delta$  10.27 (s, 1H, amide-NH), 9.09 (s, 1H, DHP-NH), 8.16 (d, 2H, *J* = 9.3 Hz, C<sub>3'</sub>, C<sub>5'</sub> nitrophenyl-H), 8.08 (d, 2H, *J* = 8.7 Hz, C<sub>3''</sub>, C<sub>5''</sub> nitrophenyl-H), 7.81 (d, 2H, *J* = 9.3 Hz, C<sub>2'</sub>, C<sub>6'</sub> nitrophenyl-H), 7.43 (d, 2H, *J* = 8.7 Hz, C<sub>2''</sub>, C<sub>6''</sub> nitrophenyl-H), 5.15 (s, 1H, DHP C<sub>4</sub>-H), 2.25-2.21 (m, 2H, cyclohexanone C<sub>8</sub>-H), 2.10 (s, 3H, DHP-CH<sub>3</sub>), 1.92-1.81 (2×m, 2H, cyclohexanone C<sub>7</sub>-H). <sup>13</sup>C NMR (75 MHz, DMSO)  $\delta$ : 194.71, 168.07, 154.80,

153.22, 146.21, 145.92, 142.45, 138.21, 129.02, 125.23, 123.84, 119.48, 109.10, 109.00, 38.60, 37.14, 26.74, 21.26, 17.67. IR (KBr)  $\nu$  ( $\text{cm}^{-1}$ ): 3253 (DHP N-H), 3071 (C-H, aromatic), 2965 (C-H, aliphatic), 1680 (C=O, ketone), 1652 (C=O, amide), 1610 (C=C, aromatic), 1530, 1346 (C-NO<sub>2</sub> aromatic); MS  $m/z$  (%): 450.10 (2) [M+2]<sup>+</sup>, 449.10 (10) [M+1]<sup>+</sup>, 448.10 (39) [M], 431.10 (30), 326.10 (100), 311.10 (81), 267.10 (13), 235.00 (29), 188.00 (19), 162.00 (21). Anal. Calcd. C, 61.60; H, 4.50; N, 12.49; Found: C, 61.46; H, 4.34; N, 12.31(%).

**3.1.2.11.** 2-methyl-4-(2-nitrophenyl)-N-(4-nitrophenyl)-5-oxo-1,4,5,6,7,8-hexahydroquinoline-3-carboxamide (**3c**)

Yield 56%; orange powder; mp. 230 °C; <sup>1</sup>H NMR (300MHz, DMSO-d<sub>6</sub>)  $\delta$  (ppm):  $\delta$  9.65 (s, 1H, amide-NH), 8.98 (s, 1H, DHP-NH), 7.83 (d, 2H,  $J = 8.7$  Hz, C<sub>3'</sub>, C<sub>5'</sub> nitrophenyl-H), 7.68-7.59 (m, 4H, C<sub>3''</sub>, C<sub>5''</sub> nitrophenyl-H, C<sub>6'</sub>, C<sub>2'</sub> nitrophenyl-H), 7.50 (d, 1H  $J = 7.8$  Hz, C<sub>6''</sub> nitrophenyl-H), 7.33-7.28 (m, 1H, C<sub>4''</sub> nitrophenyl-H), 5.56 (s, 1H, DHP C<sub>4</sub>-H), 2.47-2.43 (m, 2H, cyclohexanone C<sub>6</sub>-H), 2.14-2.08 (m, 5H, cyclohexanone C<sub>8</sub>-H, 3H, DHP-CH<sub>3</sub>), 1.85- 1.69 (2×m, 2H, cyclohexanone C<sub>7</sub>-H). IR (KBr)  $\nu$  ( $\text{cm}^{-1}$ ): 3269 (DHP N-H), 3066 (C-H, aromatic), 2951 (C-H, aliphatic), 1673 (C=O, ketone, amide), 1602 (C=C, aromatic), 1519, 1384 (C-NO<sub>2</sub> aromatic); MS  $m/z$  (%): 450.10 (1) [M+2]<sup>+</sup>, 449.10 (9) [M+1]<sup>+</sup>, 448.10 (39) [M], 431.10 (30), 416.10 (11), 326.10 (100), 309.10 (85), 235.00 (25), 188.00 (22), 162.00 (19). Anal. Calcd. C, 61.60; H, 4.50; N, 12.49; Found: C, 61.37; H, 4.31; N, 12.29 (%).

**3.1.2.12.** 4-(2-methyl-4-(3-nitrophenyl)-5-oxo-1,4,5,6,7,8-hexahydroquinoline-3-carboxamido)benzoic acid (**4d**)

Yield 57%; yellow powder; mp. 240 °C; <sup>1</sup>H NMR (300MHz, DMSO-d<sub>6</sub>)  $\delta$  (ppm):  $\delta$  9.97 (s, 1H, -OH), 9.05 (s, 1H, amide-NH), 7.99- 7.95 (m, 2H, C<sub>2''</sub>, C<sub>4''</sub> nitrophenyl-H), 7.83 (d, 2H,  $J = 8.7$  Hz, C<sub>3'</sub>, C<sub>5'</sub> benzoic acid-H), 7.67-7.61 (m, 3H, C<sub>2'</sub>, C<sub>6'</sub> benzoic acid-H, C<sub>6''</sub> nitrophenyl-H), 7.51 (t, <sup>1</sup>H,  $J = 7.5$  Hz, C<sub>5''</sub> nitrophenyl-H), 5.14 (s, <sup>1</sup>H, DHP C<sub>4</sub>-H), 2.22-2.20 (m, 2H, cyclohexanone C<sub>8</sub>-H), 2.09 (s, 3H, DHP-CH<sub>3</sub>), 1.92- 1.80 (2×m, 2H, cyclohexanone C<sub>7</sub>-H). IR (KBr)  $\nu$  ( $\text{cm}^{-1}$ ): 3435 (O-H), 3201 (DHP N-H),

3074 (C-H, aromatic), 2945 (C-H, aliphatic), 1688 (C=O, ketone, acid), 1601 (C=C, aromatic), 1526, 1385 (C-NO<sub>2</sub> aromatic); MS m/z (%): 447.10 (14) [M], 430.10 (56), 431.20 (30), 325.10 (61), 311.10 (75), 267.10 (27), 237.10 (18), 188.00 (15), 162.10 (100). Anal. Calcd. C, 64.42; H, 4.73; N, 9.39; Found: C, 64.31; H, 4.57; N, 9.23 (%).

**3.1.2.13.** 4-(2-methyl-4-(4-nitrophenyl)-5-oxo-1,4,5,6,7,8-hexahydroquinoline-3-carboxamido)benzoic acid (**4e**)

Yield 48%; yellow powder; mp. 264 °C; <sup>1</sup>H NMR (300MHz, DMSO-d<sub>6</sub>) δ (ppm): δ 9.98 (s, 1H, -OH), 9.03 (s, 1H, amide-NH), 8.31 (s, 1H, DHP-NH), 8.08 (d, 2H, *J* = 8.7 Hz, C<sub>3'</sub>, C<sub>5'</sub> nitrophenyl-H), 7.83 (d, 2H, *J* = 8.7 Hz, C<sub>3'</sub>, C<sub>5'</sub> benzoic acid-H), 7.67 (d, 2H, *J* = 8.7 Hz, C<sub>2'</sub>, C<sub>6'</sub> benzoic acid-H), 7.42 (d, 2H, *J* = 8.7Hz, C<sub>2'</sub>, C<sub>6'</sub> nitrophenyl-H), 5.13 (s, 1H, DHP C<sub>4</sub>-H), 2.23-2.19 (m, 2H, cyclohexanone C<sub>8</sub>-H), 2.08 (s, 3H, DHP-CH<sub>3</sub>), 1.91-1.80 (2m, 2H, cyclohexanone C<sub>7</sub>-H). IR (KBr) ν (cm<sup>-1</sup>): 3278 (O-H), 3204 (DHP N-H), 3066 (C-H, aromatic), 2941 (C-H, aliphatic), 1680 (C=O, ketone, acid), 1654 (C=O, amide), 1608 (C=C, aromatic), 1516, 1344 (C-NO<sub>2</sub> aromatic); MS m/z (%): 448.10 (3) [M+1]<sup>+</sup>, 430.10 (50), 325.10 (53), 311.10 (63), 267.10 (25), 237.10 (18), 188.00 (13), 162.10 (100). Anal. Calcd. C, 64.42; H, 4.73; N, 9.39; Found: C, 64.26; H, 4.53; N, 9.29 (%).

**3.1.2.14.** 4-(2-methyl-4-(2-nitrophenyl)-5-oxo-1,4,5,6,7,8-hexahydroquinoline-3-carboxamido)benzoic acid (**4c**)

Yield 61%; yellow powder; mp. 230 °C; <sup>1</sup>H NMR (300MHz, DMSO-d<sub>6</sub>) δ (ppm): δ 10.00 (s, 1H, -OH), 8.98 (s, 1H, amide-NH), 8.31 (s, 1H, DHP-NH), 7.83 (d, 2H, *J* = 8.7 Hz, C<sub>3'</sub>, C<sub>5'</sub> benzoic acid-H), 7.68- 7.59 (m, 4H, C<sub>3'</sub>, C<sub>5'</sub> nitrophenyl-H, C<sub>6'</sub>, C<sub>2'</sub> benzoic acid-H), 7.50 (d, 1H, *J* = 7.8 Hz, C<sub>6'</sub> nitrophenyl-H), 7.33-7.28 (m, 1H, C<sub>4'</sub> nitrophenyl-H), 5.56 (s, 1H, DHP C<sub>4</sub>-H), 2.46-2.44 (m, 2H, C<sub>6</sub> cyclohexanone-H), 2.15- 2.03 (m, 5H, cyclohexanone C<sub>8</sub>-H, DHP-CH<sub>3</sub>), 1.86- 1.71 (2×m, 2H, cyclohexanone C<sub>7</sub>-H). IR (KBr) ν (cm<sup>-1</sup>): 3375 (O-H), 3310 (DHP N-H), 3178 (C-H, aromatic), 2945 (C-H, aliphatic), 1679 (C=O, ketone, acid, amide), 1606



(C=C, aromatic), 1530, 1383 (C-NO<sub>2</sub> aromatic); MS m/z (%): 448.16 (4) [M+1]<sup>+</sup>, 430.10 (68), 325.10 (76), 311.10 (88), 267.10 (29), 188.00 (20), 162.10 (100). Anal. Calcd. C, 64.42; H, 4.73; N, 9.39; Found: C, 64.26; H, 4.54; N, 9.21 (%).

**3.1.2.15.** N-(4-methoxyphenyl)-2-methyl-4-(3-nitrophenyl)-5-oxo-1,4,5,6,7,8-hexahydroquinoline-3-carboxamide (**5d**)

Yield 82%; pale yellow powder; mp. 172 °C; <sup>1</sup>H NMR (300MHz, DMSO-d<sub>6</sub>) δ (ppm): δ 9.53 (s, 1H, amide-NH), 8.94 (s, 1H, DHP-NH), 8.00-7.95 (m, 2H, C<sub>2'</sub>, C<sub>4'</sub> nitrophenyl-H), 7.63 (d, 1H, J = 7.2 Hz, C<sub>6'</sub> nitrophenyl-H), 7.51 (t, 1H, J = 7.8 Hz, C<sub>5'</sub> nitrophenyl-H), 7.39 (d, 2H, J = 8.7 Hz, C<sub>2'</sub>, C<sub>6'</sub> methoxyphenyl-H), 6.82 (d, 2H, J = 8.7 Hz, C<sub>5'</sub>, C<sub>3'</sub> methoxyphenyl-H), 5.10 (s, 1H, DHP C<sub>4</sub>-H), 3.69 (s, 3H, -OCH<sub>3</sub>), 2.21-2.20 (m, 2H, cyclohexanone C<sub>8</sub>-H), 2.07 (s, 3H, DHP-CH<sub>3</sub>), 1.91-1.79 (2×m, 2H, cyclohexanone C<sub>7</sub>-H). IR (KBr) ν (cm<sup>-1</sup>): 3241 (DHP N-H), 3083 (C-H, aromatic), 2953 (C-H, aliphatic), 1670 (C=O, ketone, amide), 1604 (C=C, aromatic), 1522, 1345 (C-NO<sub>2</sub> aromatic), 1234 (C-O); MS m/z (%): 435.20 (2) [M+2]<sup>+</sup>, 434.20 (10) [M+1]<sup>+</sup>, 433.20 (36) [M], 416.20 (42), 311.10 (62), 294.10 (11), 264.10 (10), 123.10 (100).

Anal. Calcd. C, 66.50; H, 5.35; N, 9.69; Found: C, 66.35; H, 5.27; N, 9.52 (%).

**3.1.2.16.** N-(4-methoxyphenyl)-2-methyl-4-(4-nitrophenyl)-5-oxo-1,4,5,6,7,8-hexahydroquinoline-3-carboxamide (**5e**)

Yield 85%; yellow powder; mp. 249 °C; <sup>1</sup>H NMR (300MHz, DMSO-d<sub>6</sub>) δ (ppm): δ 9.52 (s, 1H, amide-NH), 8.92 (s, 1H, DHP-NH), 8.08 (d, 2H, J = 8.7 Hz, C<sub>3'</sub>, C<sub>5'</sub> nitrophenyl-H), 7.45-7.41 (m, 4H, C<sub>2'</sub>, C<sub>6'</sub> chlorophenyl, C<sub>2'</sub>, C<sub>6'</sub> nitrophenyl-H), 6.82 (d, 2H, J = 9.0 Hz, C<sub>3'</sub>, C<sub>5'</sub> chlorophenyl-H), 5.09 (s, 1H, DHP C<sub>4</sub>-H), 3.69 (s, 3H, -OCH<sub>3</sub>), 2.20-2.19 (m, 2H, cyclohexanone C<sub>8</sub>-H), 2.05 (s, 3H, DHP-CH<sub>3</sub>), 1.90- 1.78 (2×m, 2H, cyclohexanone C<sub>7</sub>-H). IR (KBr) ν (cm<sup>-1</sup>): 3306 (DHP N-H), 3077 (C-H, aromatic), 2996 (C-H, aliphatic), 1673 (C=O ketone), 1628 (C=O amide), 1614 (C=C, aromatic), 1508, 1339 (C-NO<sub>2</sub> aromatic), 1227 (C-O); MS m/z (%): 434.20 (4) [M+1]<sup>+</sup>, 433.20 (16) [M], 401.20 (13), 309.10 (100),

279.10 (20), 235.10 (39), 162.10 (26), 123.00 (36). Anal. Calcd. C, 66.50; H, 5.35; N, 9.69; Found: C, 66.41; H, 5.19; N, 9.46 (%).

**3.1.2.17.** N-(4-methoxyphenyl)-2-methyl-4-(2-nitrophenyl)-5-oxo-1,4,5,6,7,8-hexahydroquinoline-3-carboxamide (**5c**)

Yield 74%; orange powder; mp. 170 °C; <sup>1</sup>H NMR (300MHz, DMSO-d<sub>6</sub>) δ (ppm): δ 9.50 (s, 1H, amide-NH), 8.91 (s, 1H, DHP-NH), 7.63 (d, 1H, *J* = 7.2 Hz, C<sub>3'</sub>-nitrophenyl-H), 7.61-7.57 (m, 1H, C<sub>5'</sub>-nitrophenyl-H), 7.51 (d, 1H, *J* = 7.8 Hz, C<sub>6'</sub>-nitrophenyl-H), 7.43 (d, 2H, *J* = 9.0 Hz, C<sub>6'</sub>, C<sub>2'</sub>-methoxyphenyl-H), 7.33-7.28 (m, 1H, C<sub>4'</sub>-nitrophenyl-H), 6.81 (d, 2H, *J* = 9.0 Hz, C<sub>3'</sub>, C<sub>5'</sub>-chlorophenyl-H), 5.54 (s, 1H, DHP C<sub>4</sub>-H), 3.69 (s, 3H, -OCH<sub>3</sub>), 2.50-2.08 (m, 5H, cyclohexanone C<sub>8</sub>-H, DHP-CH<sub>3</sub>), 1.87-1.67 (2×m, 2H, cyclohexanone C<sub>7</sub>-H). <sup>13</sup>C NMR (75 MHz, DMSO) δ: 194.26, 166.37, 155.57, 152.77, 148.35, 141.75, 136.07, 133.55, 132.88, 131.78, 127.40, 123.51, 121.51, 114.10, 109.97, 79.62, 55.61, 36.83, 33.89, 26.70, 21.30, 17.40. IR (KBr) ν (cm<sup>-1</sup>): 3264 (DHP N-H), 3055 (C-H, aromatic), 2936 (C-H, aliphatic), 1740 (C=O ketone), 1667 (C=O amide), 1699 (C=C, aromatic), 1520, 1383 (C-NO<sub>2</sub> aromatic), 1241 (C-O); MS m/z (%): 433.20 (4) [M], 416.20 (30), 399.20 (46), 383.20 (35), 277.10 (39), 261.10 (100), 235.10 (40), 123.00 (17). Anal. Calcd. C, 66.50; H, 5.35; N, 9.69; Found: C, 66.34; H, 5.25; N, 9.41(%).

**3.1.2.18.** N-(4-cyanophenyl)-2-methyl-4-(3-nitrophenyl)-5-oxo-1,4,5,6,7,8-hexahydroquinoline-3-carboxamide (**6d**)

Yield 78%; pale yellow powder; mp. 238 °C; <sup>1</sup>H NMR (300MHz, DMSO-d<sub>6</sub>) δ (ppm): δ 10.09 (s, 1H, amide-NH), 9.09 (s, 1H, DHP-NH), 8.32-7.93 (m, 2H, C<sub>2'</sub>, C<sub>4'</sub>-nitrophenyl-H), 7.75-7.68 (m, 4H, C<sub>2'</sub>, C<sub>3'</sub>, C<sub>5'</sub>, C<sub>6'</sub>-cyanophenyl-H), 7.62 (d, 1H, *J* = 7.8 Hz, C<sub>6'</sub>-nitrophenyl-H), 7.51 (t, 1H, *J* = 7.5 Hz, C<sub>5'</sub>-nitrophenyl-H), 5.14 (s, 1H, DHP C<sub>4</sub>-H), 2.23-2.20 (m, 2H, cyclohexanone C<sub>8</sub>-H), 2.09 (s, 3H, DHP-CH<sub>3</sub>), 1.92-1.80 (2×m, 2H, cyclohexanone C<sub>7</sub>-H). IR (KBr) ν (cm<sup>-1</sup>): 3280 (DHP N-H), 3066 (C-H, aromatic), 2950 (C-H, aliphatic), 2220 (C≡N), 1682 (C=O ketone), 1640 (C=O amide), 1604 (C=C,

aromatic), 1526, 1352 (C-NO<sub>2</sub> aromatic); MS m/z (%): 429.20 (5) [M+1]<sup>+</sup>, 411.20 (64), 311.10 (96), 306.10 (87), 267.10 (34), 237.10 (20), 162.10 (100). Anal. Calcd. C, 67.28; H, 4.71; N, 13.08; Found: C, 67.13; H, 4.56; N, 12.84 (%).

**3.1.2.19.** N-(4-cyanophenyl)-2-methyl-4-(4-nitrophenyl)-5-oxo-1,4,5,6,7,8-hexahydroquinoline-3-carboxamide (**6e**)

Yield 83%; pale yellow powder; mp. 257 °C; <sup>1</sup>H NMR (300MHz, DMSO-d<sub>6</sub>) δ (ppm): δ 10.11 (s, 1H, amide-NH), 9.08 (s, 1H, DHP-NH), 8.08 (d, 2H, *J* = 8.7 Hz, C<sub>3'</sub>, C<sub>5'</sub> nitrophenyl-H), 7.76-7.68 (m, 4H, C<sub>2'</sub>, C<sub>6'</sub>, C<sub>3'</sub>, C<sub>5'</sub> cyanophenyl-H), 7.42 (d, 2H, *J* = 8.4 Hz, C<sub>2''</sub>, C<sub>6''</sub> nitrophenyl-H), 5.13 (s, 1H, DHP C<sub>4</sub>-H), 2.25-2.20 (m, 2H, cyclohexanone C<sub>8</sub>-H), 2.08 (s, 3H, DHP-CH<sub>3</sub>), 1.91-1.80 (2×m, 2H, cyclohexanone C<sub>7</sub>-H). <sup>13</sup>C NMR (75 MHz, DMSO) δ 194.68, 167.90, 154.81, 153.40, 153.28, 146.19, 143.86, 137.69, 133.50, 129.03, 123.83, 119.89, 119.59, 108.88, 105.13, 38.65, 37.14, 26.76, 21.27, 17.61. IR (KBr) ν (cm<sup>-1</sup>): 3278 (DHP N-H), 3072 (C-H, aromatic), 2943 (C-H, aliphatic), 2221 (C≡N), 1655 (C=O ketone), 1682 (C=O amide), 1604 (C=C, aromatic), 1582, 1346 (C-NO<sub>2</sub> aromatic); MS m/z (%): 429.20 (3) [M+2]<sup>+</sup>, 428.20 (10) [M+1]<sup>+</sup>, 396.20 (7), 311.10 (96), 309.10 (100), 284.10 (13), 235.10 (24), 162.10 (31). Anal. Calcd. C, 67.28; H, 4.71; N, 13.08; Found: C, 67.12; H, 4.53; N, 12.73 (%).

**3.1.2.20.** N-(4-cyanophenyl)-2-methyl-4-(2-nitrophenyl)-5-oxo-1,4,5,6,7,8-hexahydroquinoline-3-carboxamide (**6c**)

Yield 69%; yellow powder; mp. 270 °C; <sup>1</sup>H NMR (300MHz, DMSO-d<sub>6</sub>) δ (ppm): δ 10.15 (s, 1H, amide-NH), 9.01 (s, 1H, DHP-NH), 7.76-7.68 (m, 4H, C<sub>3'</sub>, C<sub>5'</sub> nitrophenyl-H, C<sub>2'</sub>, C<sub>6'</sub> cyanophenyl-H), 7.68-7.59 (m, 2H, C<sub>3'</sub>, C<sub>5'</sub> cyanophenyl-H), 7.51 (d, 1H, *J* = 7.5 Hz, C<sub>6''</sub> nitrophenyl-H), 7.33-7.28 (m, 1H, C<sub>3''</sub> nitrophenyl-H), 5.55 (s, 1H, DHP C<sub>4</sub>-H), 2.15-2.09 (m, 2H, cyclohexanone C<sub>8</sub>-H), 2.06 (s, 3H, DHP-CH<sub>3</sub>), 1.86-1.72 (2×m, 2H, cyclohexanone C<sub>7</sub>-H). IR (KBr) ν (cm<sup>-1</sup>): 3310 (DHP N-H), 3076 (C-H, aromatic), 2948 (C-H, aliphatic), 2228 (C≡N), 1673 (C=O ketone), 1631 (C=O amide), 1604 (C=C, aromatic), 1530, 1352 (C-NO<sub>2</sub> aromatic); MS m/z (%): 429.20 (5) [M+1]<sup>+</sup>, 428.20 (18) [M], 411.20 (64),

311.10 (96), 309.10 (87), 267.10 (34), 237.10 (20), 162.10 (100). Anal. Calcd. C, 67.28; H, 4.71; N, 13.08; Found: C, 67.09; H, 4.59; N, 12.90 (%).

**3.1.2.21.** N,N-diethyl-2-methyl-4-(3-nitrophenyl)-5-oxo-1,4,5,6,7,8-hexahydroquinoline-3-carboxamide  
**(7d)**

Yield 18%; yellow powder; mp. 173 °C; <sup>1</sup>H NMR (400MHz, CDCl<sub>3</sub>) δ (ppm): δ 8.09 (t, 1H, *J* = 1.5 Hz C<sub>2''</sub> nitrophenyl-H), 8.10-8.09 (m, 1H, C<sub>4''</sub> nitrophenyl-H), 7.63 (d, 1H, *J* = 5.7 Hz, C<sub>6''</sub> nitrophenyl-H), 7.41 (t, 1H, *J* = 6.0 Hz, C<sub>5''</sub> nitrophenyl-H), 6.14 (s, 1H, DHP N-H), 4.96 (s, 1H, DHP C<sub>4</sub>-H), 3.49 (t, 1H, *J* = 5.1 Hz, cyclohexanone C<sub>6</sub>-H), 3.26-3.15 (m, 3H, C<sub>6</sub> cyclohexanone-H, CH<sub>3</sub>-CH<sub>2</sub>-N), 2.50 (m, 2H, cyclohexanone C<sub>8</sub>-H), 2.37-2.33 (m, 2H, CH<sub>3</sub>-CH<sub>2</sub>-N), 2.05-2.01 (m, 2H, cyclohexanone C<sub>7</sub>-H), 1.64 (s, 3H, DHP-CH<sub>3</sub>), 1.08 (s, 3H, CH<sub>3</sub>-CH<sub>2</sub>-N), 0.78-0.77 (m, 3H, CH<sub>3</sub>-CH<sub>2</sub>-N). IR (KBr) ν (cm<sup>-1</sup>): 3272 (DHP N-H), 3069 (C-H, aromatic), 2948 (C-H, aliphatic), 1681 (C=O, ketone), 1655 (C=O, amide), 1609 (C=C, aromatic), 1533, 1335 (C-NO<sub>2</sub> aromatic) MS m/z (%): 384.30 (3) [M+1]<sup>+</sup>, 383.20 (11) [M], 366.30 (100), 321.20 (14), 311.20 (8), 261 (60), 188.10 (26), 160.10 (10). Anal. Calcd. C, 65.78; H, 6.57; N, 10.96; Found: C, 65.62; H, 6.43; N, 10.78 (%).

**3.1.2.22.** N,N-diethyl-2-methyl-4-(4-nitrophenyl)-5-oxo-1,4,5,6,7,8-hexahydroquinoline-3-carboxamide  
**(7e)**

Yield 26%; yellow powder; mp. 139 °C; <sup>1</sup>H NMR (300MHz, DMSO-d<sub>6</sub>) δ (ppm): δ 8.83 (s, 1H, amide-NH), 8.09 (d, 2H, *J* = 8.7 Hz, C<sub>3''</sub>, C<sub>5''</sub> nitrophenyl-H), 7.33 (d, 2H, *J* = 8.7 Hz, C<sub>2''</sub>, C<sub>6''</sub> nitrophenyl-H), 4.72 (s, 1H, DHP C<sub>4</sub>-H), 3.06-3.05 (m, 4H, 2 × CH<sub>3</sub>-CH<sub>2</sub>-N), 2.20-1.87 (m, 5H, cyclohexanone-H), 1.72 (s, 3H, DHP-CH<sub>3</sub>), 0.96-0.59 (m, 6H, 2 × CH<sub>3</sub>-CH<sub>2</sub>-N). IR (KBr) ν (cm<sup>-1</sup>): 3288 (DHP N-H), 3069 (C-H, aromatic), 2972 (C-H, aliphatic), 1682 (C=O ketone), 1610 (C=O amide), 1584 (C=C, aromatic), 1514, 1382 (C-NO<sub>2</sub> aromatic); MS m/z (%): 385.30 (3) [M+2]<sup>+</sup>, 384.30 (22) [M+1]<sup>+</sup>, 383.30 (93) [M], 368.20 (10), 311.20 (15), 282.20 (11), 261 (100), 188.10 (35), 160.10 (13). Anal. Calcd. C, 65.78; H, 6.57; N, 10.96; Found: C, 65.62; H, 6.39; N, 10.74 (%).

**3.1.2.23.** N,N-diethyl-2-methyl-4-(2-nitrophenyl)-5-oxo-1,4,5,6,7,8-hexahydroquinoline-3-carboxamide (**7c**)

Yield 30%; yellow powder; mp. 212 °C; <sup>1</sup>H NMR (300MHz, DMSO-d<sub>6</sub>) δ (ppm): δ 7.44- 7.34 (m, 2H, C<sub>2'</sub>, C<sub>5'</sub> nitrophenyl-H), 7.22 (d, 1H, *J* = 8.7 Hz, C<sub>6'</sub> nitrophenyl-H), 7.10-7.07 (m, 1H, C<sub>4'</sub> nitrophenyl-H), 4.95 (s, 1H, DHP C<sub>4</sub>-H), 2.95-2.61 (m, 2H, CH<sub>3</sub>-CH<sub>2</sub>-N), 2.24-2.22 (m, 2H, CH<sub>3</sub>-CH<sub>2</sub>-N), 1.92-1.49 (m, 8H, DHP-CH<sub>3</sub>, 6H, cyclohexanone-H), 1.02-0.76 (m, 6H, 2×CH<sub>3</sub>-CH<sub>2</sub>-N). <sup>13</sup>C NMR (75 MHz, DMSO): δ 194.11, 168.88, 168.28, 153.77, 133.39, 131.77, 131.72, 127.14, 123.22, 110.85, 108.30, 36.81, 36.81, 34.09, 26.76, 21.34, 16.18, 14.66, 12.85. IR (KBr) ν (cm<sup>-1</sup>): 3203 (DHP N-H), 3072 (C-H, aromatic), 2950 (C-H, aliphatic), 1679 (C=O ketone), 1613 (C=O amide), 1524, 1365 (C-NO<sub>2</sub> aromatic); MS m/z (%): 384.30 (2) [M+1]<sup>+</sup>, 383.30 (8) [M], 366.30 (100), 321.20 (21), 308.20 (27), 261.20 (33), 235.10 (12), 188.10 (16), 160.10 (8). Anal. Calcd. C, 65.78; H, 6.57; N, 10.96; Found: C, 65.59; H, 6.35; N, 10.78 (%).

**3.1.2.24.** N,N-diethyl-2-methyl-5-oxo-4-phenyl-1,4,5,6,7,8-hexahydroquinoline-3-carboxamide (**3f**)

Yield 48%; white powder; mp. 220 °C; <sup>1</sup>H NMR (300MHz, DMSO-d<sub>6</sub>) δ (ppm): δ 8.63 (s, 1H, amide-NH), 7.19 (t, 2H, *J* = 7.5 Hz, C<sub>3'</sub>, C<sub>5'</sub> phenyl-H), 7.11-7.04 (m, 3H, C<sub>2'</sub>, C<sub>4'</sub>, C<sub>6'</sub> phenyl-H), 4.58 (s, 1H, DHP C<sub>4</sub>-H), 2.98-2.95 (m, 3H, CH<sub>3</sub>-CH<sub>2</sub>-N), 2.16-2.14 (m, 2H, cyclohexanone C<sub>8</sub>-H), 1.90-1.87 (m, 2H, CH<sub>3</sub>, cyclohexanone C<sub>7</sub>-H), 1.68 (s, 3H, DHP-CH<sub>3</sub>), 0.96 (m, 3H, CH<sub>3</sub>-CH<sub>2</sub>-N), 0.46 (m, 3H, CH<sub>3</sub>-CH<sub>2</sub>-N). IR (KBr) ν (cm<sup>-1</sup>): 3262 (DHP N-H), 3105 (C-H, aromatic), 2989 (C-H, aliphatic), 1681 (C=O ketone), 1638 (C=O amide), 1623 (C=C, aromatic), 1586, 1379 (C-NO<sub>2</sub> aromatic); MS m/z (%): 340.30 (3) [M+2]<sup>+</sup>, 339.30 (23) [M+1]<sup>+</sup>, 338.30 (95) [M], 266.20 (22), 261.20 (100), 238.20 (14), 188.10 (32), 160.10 (11). Anal. Calcd. C, 74.52; H, 7.74; N, 8.28; Found: C, 74.34; H, 7.53; N, 8.17(%).

**3.1.2.25.** N,N,2-trimethyl-4-(4-nitrophenyl)-5-oxo-1,4,5,6,7,8-hexahydroquinoline-3-carboxamide (**8e**)

Yield 16%; yellow powder; mp. 206 °C; <sup>1</sup>H NMR (300MHz, DMSO-d<sub>6</sub>) δ (ppm): δ 8.83 (s, 1H, amide-NH), 8.09 (d, 2H, *J* = 8.7 Hz, C<sub>3'</sub>, C<sub>5'</sub>, nitrophenyl-H), 7.32 (d, 2H, *J* = 8.7 Hz, C<sub>2'</sub>, C<sub>6'</sub> nitrophenyl-H),

4.72 (s, 1H, DHP C<sub>4</sub>-H), 2.72 (s, 3H, CH<sub>3</sub>-N), 2.37 (s, 3H, CH<sub>3</sub>-N), 2.22-2.15 (m, 2H, cyclohexanone C<sub>8</sub>-H), 1.92-1.89 (m, 2H, cyclohexanone C<sub>7</sub>-H), 1.67 (s, 3H, DHP-CH<sub>3</sub>). IR (KBr)  $\nu$  (cm<sup>-1</sup>): 3253 (DHP N-H), 3071 (C-H, aromatic), 2965 (C-H, aliphatic), 1680 (C=O, ketone), 1652 (C=O, amide), 1610 (C=C, aromatic), 1530, 1346 (C-NO<sub>2</sub> aromatic); MS m/z (%): 357.20 (3) [M+2]<sup>+</sup>, 356.20 (22) [M+1]<sup>+</sup>, 355.20 (100) [M], 340.20 (13), 311.10 (13), 233.20 (98), 216.10 (16), 188.10 (48), 160.10 (15). Anal. Calcd. C, 64.21; H, 5.96; N, 11.82; Found: C, 64.03; H, 5.75; N, 11.71 (%).

**3.1.2.26.** N,N,2-trimethyl-5-oxo-4-phenyl-1,4,5,6,7,8-hexahydroquinoline-3-carboxamide (**8f**)

Yield 51%; white powder; mp. 221 °C; <sup>1</sup>H NMR (300MHz, DMSO-d<sub>6</sub>)  $\delta$  (ppm):  $\delta$  8.65 (s, 1H, amide-NH), 7.20 (t, 2H, *J* = 7.5 Hz, C<sub>3''</sub>, C<sub>5''</sub> phenyl-H), 7.10 (t, 1H, *J* = 7.2 Hz, C<sub>4''</sub> phenyl-H), 7.02 (d, 2H, *J* = 7.2 Hz, C<sub>2''</sub>, C<sub>6''</sub> phenyl-H), 4.60 (s, 1H, DHP C<sub>4</sub>-H), 2.73 (s, 3H, CH<sub>3</sub>-N), 2.47-2.46 (m, 2H, cyclohexanone C<sub>6</sub>-H), 2.37 (s, 3H, CH<sub>3</sub>-N), 2.22-2.16 (m, 2H, cyclohexanone C<sub>8</sub>-H), 1.92-1.90 (m, 2H, cyclohexanone C<sub>7</sub>-H), 1.67 (s, 3H, DHP-CH<sub>3</sub>). IR (KBr)  $\nu$  (cm<sup>-1</sup>): 3256 (DHP N-H), 3104 (C-H, aromatic), 2988 (C-H, aliphatic), 1736 (C=O ketone), 1680 (C=O amide), 1641 (C=C, aromatic), 1504, 1379 (C-NO<sub>2</sub> aromatic); MS m/z (%): 312.20 (2) [M+2]<sup>+</sup>, 311.20 (18) [M+1]<sup>+</sup>, 310.20 (83) [M], 266.10 (16), 233.20 (100), 209.10 (16), 188.10 (43), 160.10 (13). Anal. Calcd. C, 73.52; H, 7.14; N, 9.03; Found: C, 73.38; H, 7.02; N, 8.80 (%).
